# Supplementary material for: In situ synthesis of permselective zeolitic imidazolate framework-8/graphene oxide composites: rotating disk electrode and Langmuir adsorption isotherm
Source: Royal Society of Chemistry journal article supplement (doi:10.1039/c5ra05950j), 2015-01-01
Supplement: c5ra05950j1.pdf [file c5ra05950j1.pdf]

## Supporting Information

### ***In Situ* Synthesis of Permselective Zeolitic Imidazolate Framework-8/Graphene Oxide Composites: Rotating Disk Electrode and Langmuir Adsorption Isotherm**

Santamon Luanwuthi,<sup>a</sup> Atiweena Krittayavathananon,<sup>a</sup> Pattarachai Srimuk<sup>a</sup> and Montree Sawangphruk<sup>\*ab</sup>

<sup>a</sup>*Department of Chemical Engineering, Faculty of Engineering, Kasetsart University, Bangkok 10900, Thailand.*

<sup>b</sup>*Center for Advanced Studies in Nanotechnology and its Applications in Chemical, Food and Agricultural Industries, Kasetsart University, Bangkok 10900, Thailand.*

*\*Corresponding author: M. Sawangphruk*

*Tel: +66(0)2-942-8555 Fax: +66(0)2-561-4621. E-mail: fengmrs@ku.ac.th*

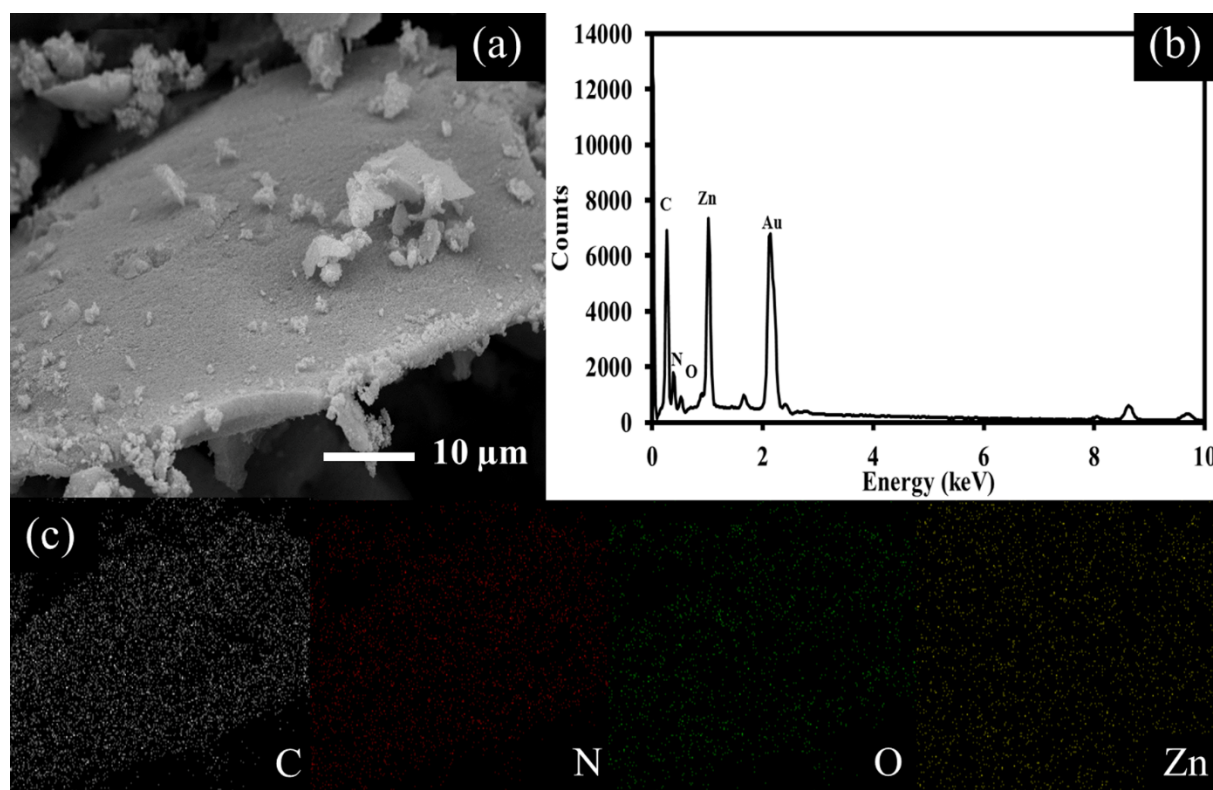

**Figure S1.** (a) FE-SEM image, (b) EDX spectrum, and (c) EDX mapping images of 2wt% GO/ZIF-8.

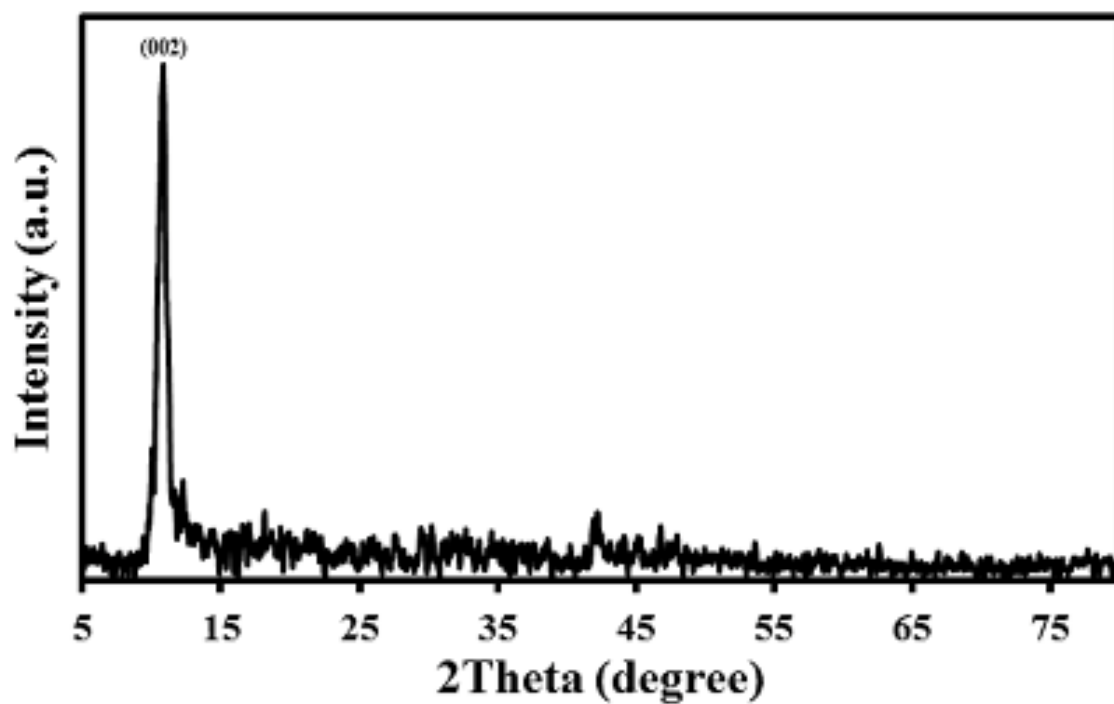

**Figure S2.** XRD pattern of the control GO produced by the same method as the composite with using ZIF-8 precursor.

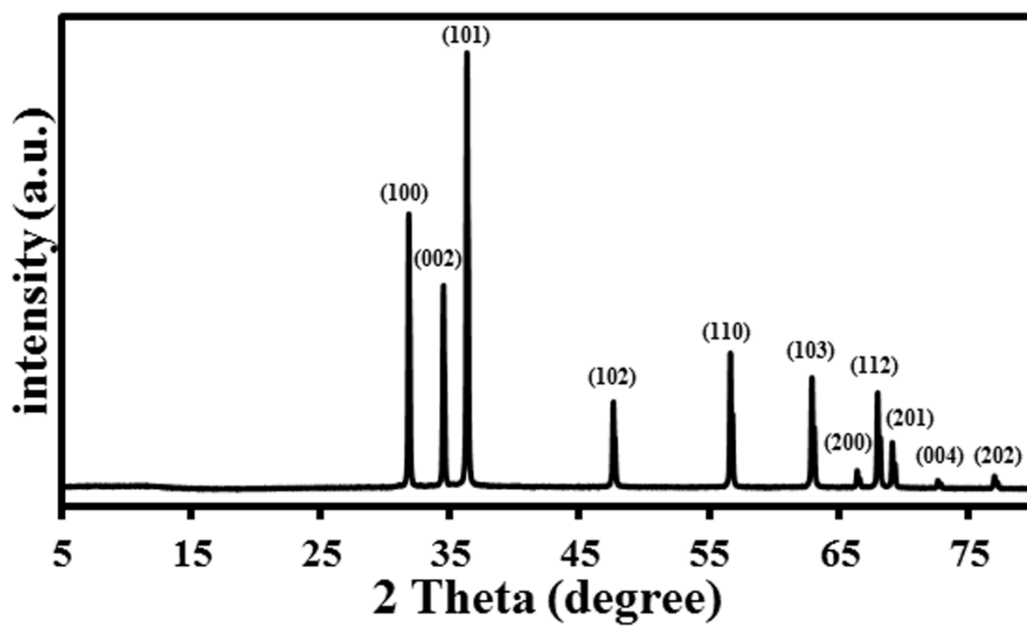

**Figure S3.** XRD pattern of ZnO produced by the calcination of ZIF-8 at 600 °C.

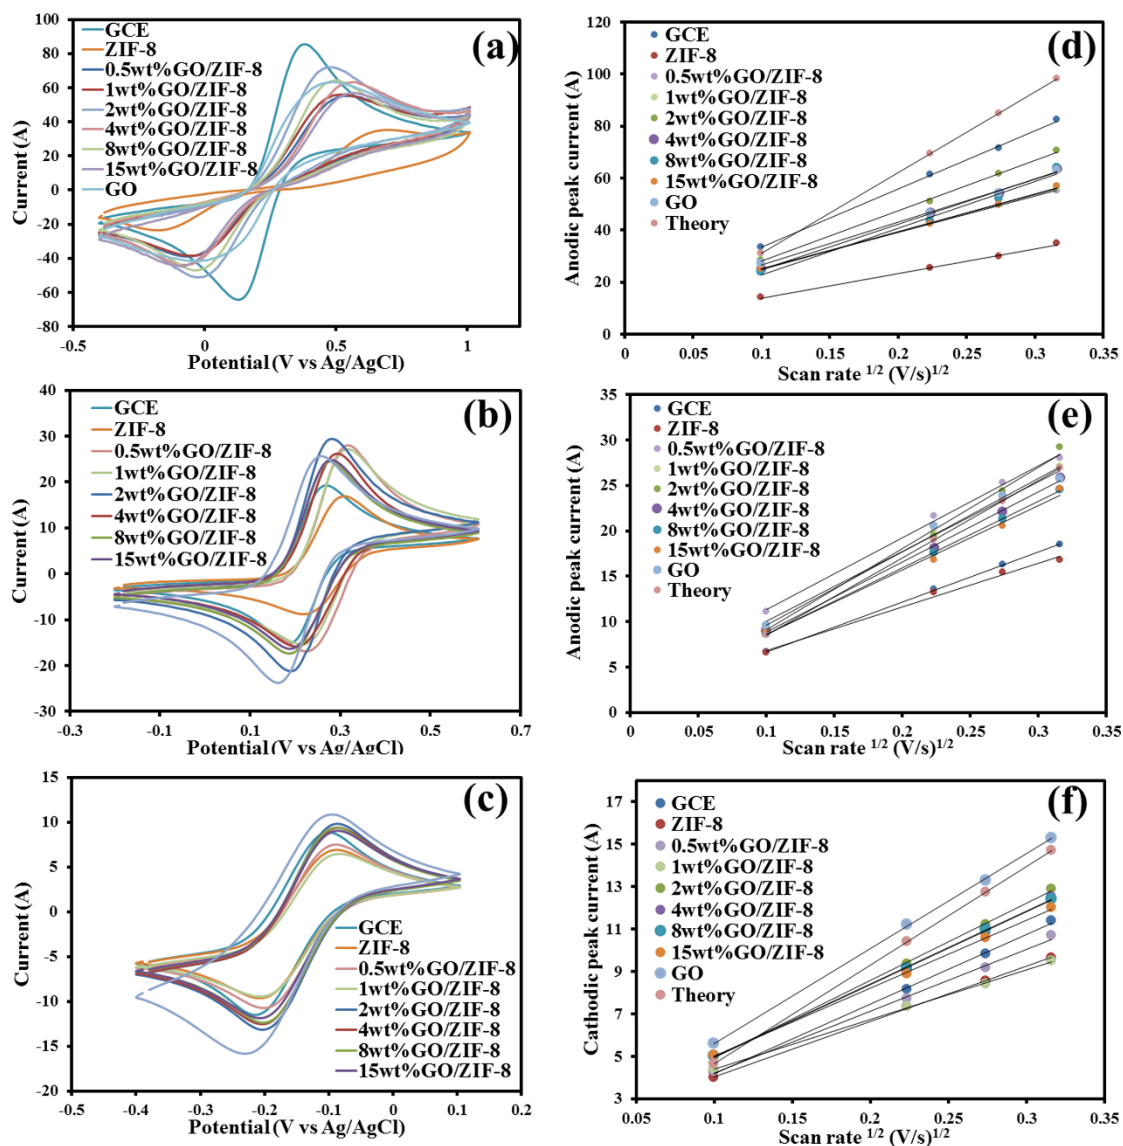

**Figure S4.** Cyclic voltammograms of GCE, ZIF-8, and the composites in (a) 6 mM  $\text{Fe}(\text{CN})_6^{4-}$  in 0.1 M KCl, (b) 1.6 mM FcOH in 0.1 M KCl and (c) 1 mM  $\text{Ru}(\text{NH}_3)_6^{3+}$  in 0.1 M KCl as well as Randles-Sevcik plots of the as-prepared electrodes in (d) 6 mM  $\text{Fe}(\text{CN})_6^{4-}$  in 0.1 M KCl, (e) 1.6 mM FcOH in 0.1 M KCl and (f) 1 mM  $\text{Ru}(\text{NH}_3)_6^{3+}$  in 0.1 M KCl.
